# Supplementary material
Source: MDPI journal article supplement (https://www.mdpi.com/1424-8247/16/10/1362)
Supplement: s1 [file s1]

*Supplementary Materials*

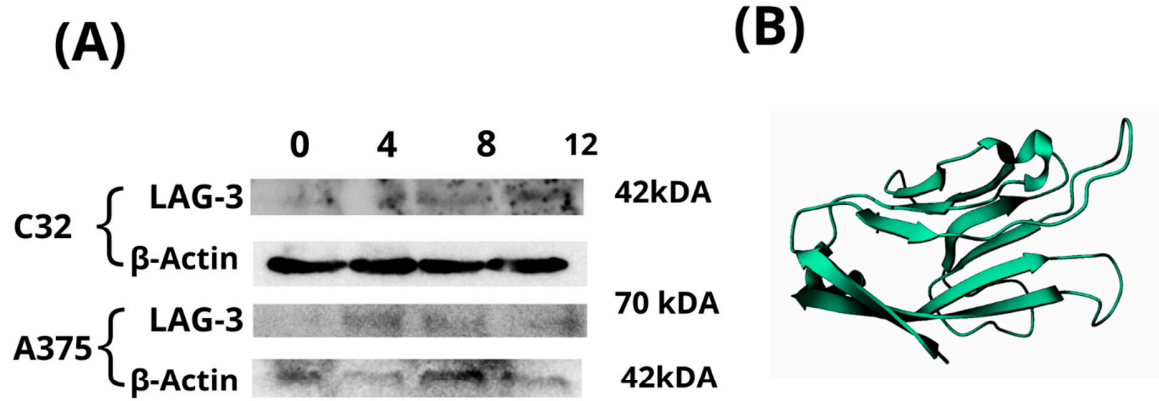

**Figure S1.** (A) Western Blot analysis of the LAG-3 antigen expression following 0-12kV/cm, 200ns, 100p, 10kHz nsPEF exposure on C32 and A375 cells, and (B) molecular structure of LAG-3 antigen (PDB: 7TZE) [39].
